# Supplementary material
Source: HighWire-hosted journal article supplement (https://genome.cshlp.org/content/suppl/2007/05/21/17.6.775)
Supplement: SupplFig1_AlignabDefin.pdf [file SupplFig1_AlignabDefin.pdf]

Distinguishing missing sequence using alignments and the sequences of the contigs.

Alignment blocks

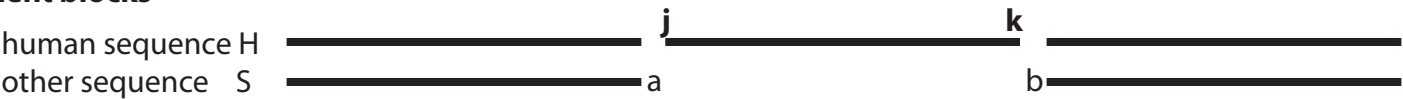

Sequences of S in contigs

Case 1: Single contig, deletion relative to H

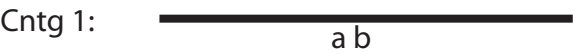

Human aligns to S in j,k? NO

Case 2: Separate contigs, bounded by a and b

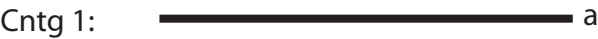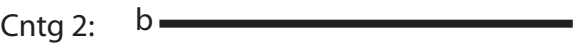

Human aligns to S in j,k? Unknown

Case 3: a or b is internal

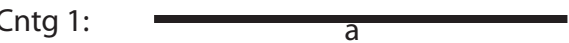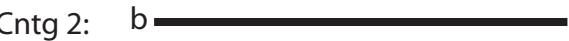

Human aligns to S in j,k? NO

Case 4: Poor or missing sequence

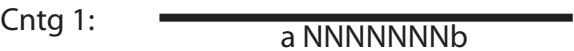

Human aligns to S in j,k?Unknown
